# Supplementary material
Source: Frontiers journal article supplement (https://www.frontiersin.org/articles/210083)
Supplement: Table_1.PDF [file Table_1.PDF]

**Supplemental Table 1. Protein domain abbreviations.** Domain definitions are from the Conserved Domain Database (CDD) (1). Shorter abbreviations were used in figures for the three most common domains, shown at the top of the list.

| <b>Domain abbreviation</b> | <b>Possible function (CDD)</b>                                                                                                                                 |
|----------------------------|----------------------------------------------------------------------------------------------------------------------------------------------------------------|
| HisKA (K)                  | Histidine kinase; Dimerization and phosphoacceptor domain                                                                                                      |
| HATPase_c (A)              | Histidine kinase-like ATPases                                                                                                                                  |
| REC (R)                    | Phosphoacceptor; contains a phosphoacceptor site that is phosphorylated by histidine kinase homologues                                                         |
| 7TMR DISMED2               | Extracellular receptor, possibly for carbohydrates                                                                                                             |
| AAA                        | ATPase family associated with various cellular activities                                                                                                      |
| ApoLp_III                  | Lipid transport (in insects)                                                                                                                                   |
| Cache_1                    | Extracellular small-molecule recognition                                                                                                                       |
| CHASE, CHASE2, CHASE3      | Extracellular ligand binding                                                                                                                                   |
| CHD                        | Cyclase homology domains; includes eukaryotic and prokaryotic adenylate and guanylate cyclases                                                                 |
| CheY                       | CheY-like receiver (REC) domain                                                                                                                                |
| COG3292                    | Predicted periplasmic ligand-binding sensor domain                                                                                                             |
| COG3899                    | Predicted ATPase [General function prediction only]                                                                                                            |
| COG4191                    | Signal transduction histidine kinase (C4-dicarboxylate transport)                                                                                              |
| Cortex_I_coil              | 18-heptad-repeat alpha-helical coiled-coil (known from an actin-bundling protein)                                                                              |
| DivIVA_sup                 | Found as repeated domain in some proteins; known from a cell-division protein                                                                                  |
| ds_DNAbind                 | (not found)                                                                                                                                                    |
| EAL                        | Diguanylate phosphodiesterase. Named after conserved residues. Often found with GGDEF.                                                                         |
| FhlA                       | Transcriptional regulator containing GAF, AAA-type ATPase, and DNA binding domains                                                                             |
| Fic_sup                    | "Filamentation induced by cAMP"; known from cell-division protein                                                                                              |
| GAF, GAF_2, GAF_3          | Sensor; Present in cGMP-specific phosphodiesterases, adenylate and guanylate cyclases, phytochromes, FhlA and NifA; may respond to cGMP, light, other proteins |
| GGDEF                      | c-di-GMP turnover. Shows homology to the adenylate cyclase catalytic domain; found in variety of cell-signaling proteins. Often found with EAL.                |
| HAMP                       | Signal transduction (by conformational change)                                                                                                                 |
| HemX                       | HemX is a membrane protein that downregulates HemA                                                                                                             |
| MASE1                      | Predicted integral membrane sensory domain                                                                                                                     |
| Mod_r                      | "Modifier of rudimentary" ( <i>Drosophila</i> ); function unknown                                                                                              |
| Nup54                      | human Nup54 subunit of the nucleoporin complex                                                                                                                 |

|               |                                                                                                                                                               |
|---------------|---------------------------------------------------------------------------------------------------------------------------------------------------------------|
| OmpH_sup      | Outer membrane domain                                                                                                                                         |
| PAC           | Domain C-terminal to some PAS domains                                                                                                                         |
| PAS           | Cytoplasmic sensor domain                                                                                                                                     |
| PKc           | Catalytic domain of protein kinases                                                                                                                           |
| PP2Cc         | Serine/threonine phosphatases, family 2C, catalytic domain                                                                                                    |
| PRK13923      | Putative spore coat protein regulator protein in <i>B. subtilis</i>                                                                                           |
| PTZ00423      | glideosome-associated protein 45 in apicomplexan parasites                                                                                                    |
| Reg_prop      | N-terminal domain of 14 tandem repeats , possibly in beta propeller conformation; DNA binding? Protein-protein interactions?                                  |
| RILP_like_sup | Found in Rab interacting lysosomal protein-like 1 and 2 (Bilateria)                                                                                           |
| SpoIIE        | Bacterial stage II sporulation E proteins: required for formation of a normal polar septum during sporulation. N-terminal region predicted membrane-spanning. |
| Tar_Tsr_LBD   | Homodimeric receptors with N-terminal periplasmic ligand binding domain, transmembrane region, HAMP domain, and C-terminal cytosolic signaling domain         |
| TMF_TATA_bd   | C-terminal coiled coil of TATA element modulatory factor 1 proteins (eukaryotes), which compete with TATA-binding proteins                                    |
| TPR           | Tetratricopeptide repeat domain (uncertain function)                                                                                                          |
| Tropomyosin_1 | Eukaryotic morphogenesis                                                                                                                                      |
| Vgb-SGL       | Streptogramin lyase                                                                                                                                           |
| Y_Y_Y         | Mostly found at the end of the beta propellers (pfam07494) in a family of two component regulators.                                                           |

## References

1. **Marchler-Bauer A, Lu SN, Anderson JB, Chitsaz F, Derbyshire MK, DeWeese-Scott C, Fong JH, Geer LY, Geer RC, Gonzales NR, Gwadz M, Hurwitz DI, Jackson JD, Ke ZX, Lanczycki CJ, Lu F, Marchler GH, Mullokandov M, Omelchenko MV, Robertson CL, Song JS, Thanki N, Yamashita RA, Zhang DC, Zhang NG, Zheng CJ, Bryant SH.** 2011. CDD: a Conserved Domain Database for the functional annotation of proteins. *Nucleic Acids Research* **39**:D225-D229.
